# Supplementary material for: Curcumin Nanoparticles Enhance Mycobacterium bovis BCG Vaccine Efficacy by Modulating Host Immune Responses
Source: PubMed Central journal article supplement (PMC6803339; doi:10.1128/iai.00291-19), 2019-10-18
Supplement: IAI.00291-19-s0001.pdf [file IAI.00291-19-s0001.pdf]

Supplementary Table 1: Nano-curcumin increases the TCM: TEM ratio both in Spleen and lungs of BCG Immunised mice.

|        |                  | CD44-CD62L gated population      | H37Rv | NC+H37Rv | BCG+H37Rv | BCG+NC+H37Rv |
|--------|------------------|----------------------------------|-------|----------|-----------|--------------|
| Spleen | CD4 <sup>+</sup> | T <sub>CM</sub> /T <sub>EM</sub> | 0.39  | 0.24     | 0.45      | 0.57         |
|        | CD8 <sup>+</sup> | T <sub>CM</sub> /T <sub>EM</sub> | 0.3   | 0.27     | 0.37      | 0.52         |
| Lungs  | CD4 <sup>+</sup> | T <sub>CM</sub> /T <sub>EM</sub> | 0.1   | 0.10     | 0.16      | 0.24         |
|        | CD8 <sup>+</sup> | T <sub>CM</sub> /T <sub>EM</sub> | 0.14  | 0.15     | 0.2       | 0.26         |

|        |                  | CD44-CCR7 gated population       | H37Rv | NC+H37Rv | BCG+H37Rv | BCG+NC+H37Rv |
|--------|------------------|----------------------------------|-------|----------|-----------|--------------|
| Spleen | CD4 <sup>+</sup> | T <sub>CM</sub> /T <sub>EM</sub> | 0.36  | 0.38     | 0.46      | 0.78         |
|        | CD8 <sup>+</sup> | T <sub>CM</sub> /T <sub>EM</sub> | 0.24  | 0.25     | 0.34      | 0.56         |
| Lungs  | CD4 <sup>+</sup> | T <sub>CM</sub> /T <sub>EM</sub> | 0.32  | 0.4      | 0.37      | 0.53         |
|        | CD8 <sup>+</sup> | T <sub>CM</sub> /T <sub>EM</sub> | 0.35  | 0.47     | 0.64      | 0.73         |

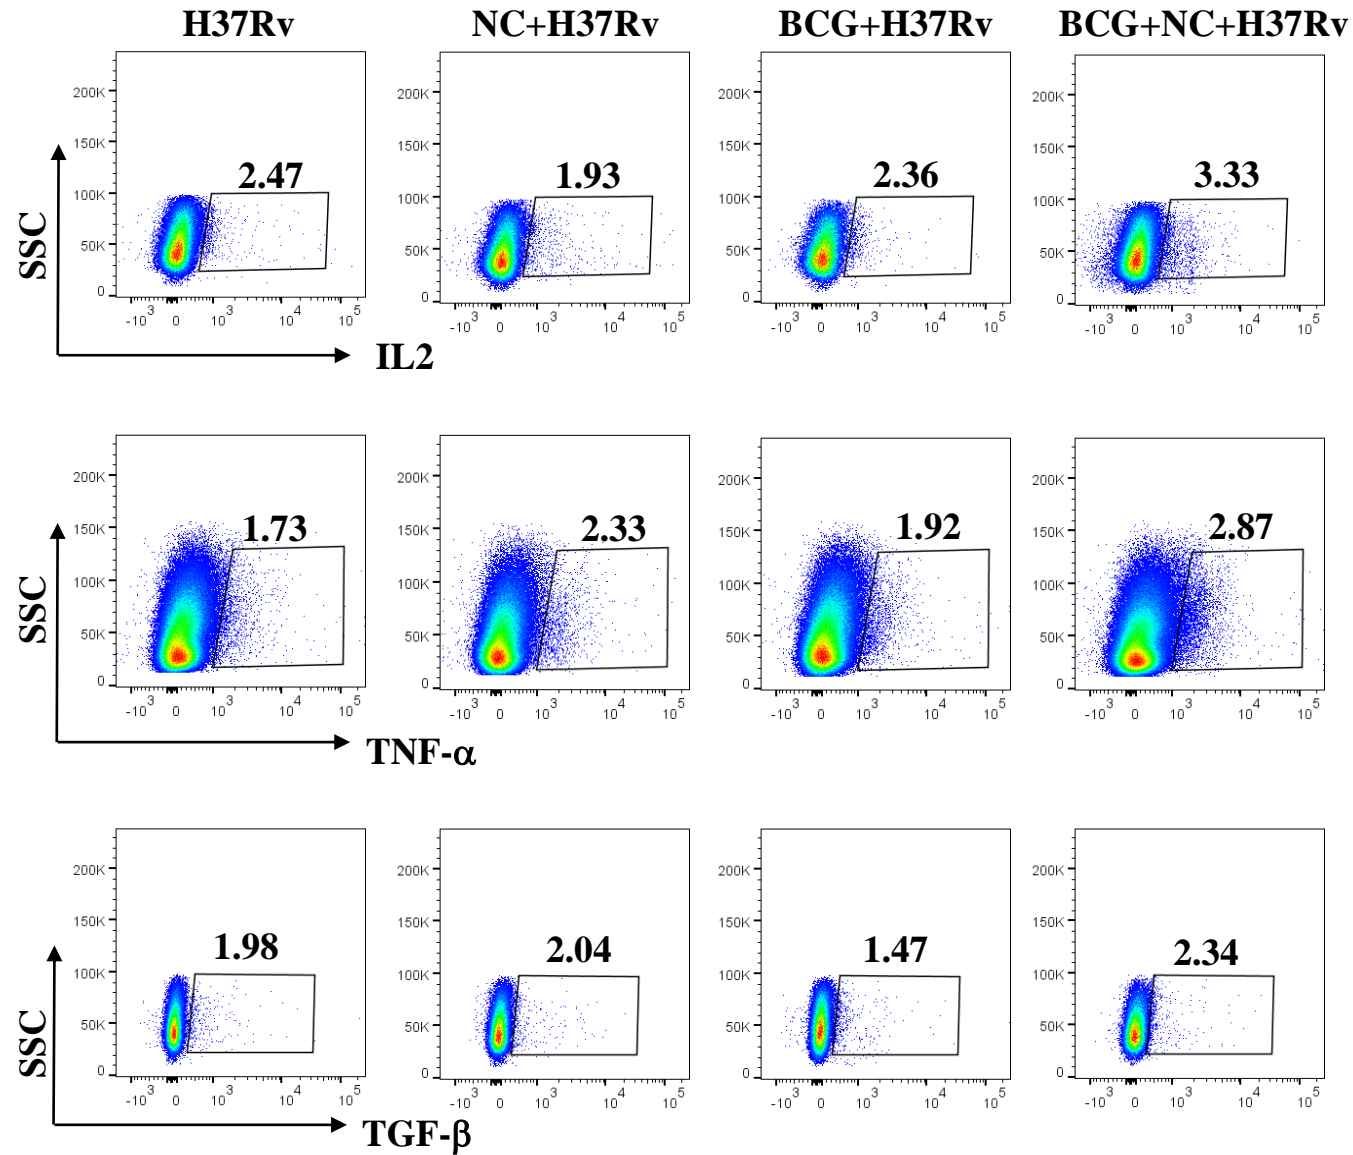

**Supplementary Fig. 1 : Representative pseudo colour plots of IL-2-, TNF- $\alpha$ - and TGF- $\beta$ -cytokine producing cells in splenocytes of different experimental groups.**
